# Supplementary material
Source: Springer Nature journal article supplement (https://www.springermedizin.de/resource/supplementary/13023_2011_369_MOESM5_ESM.pdf/9642204)

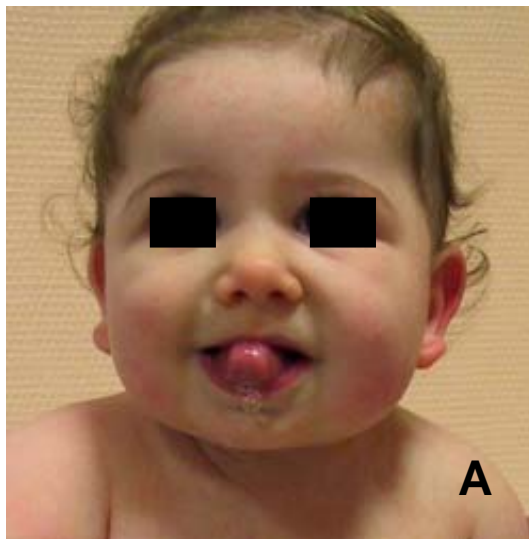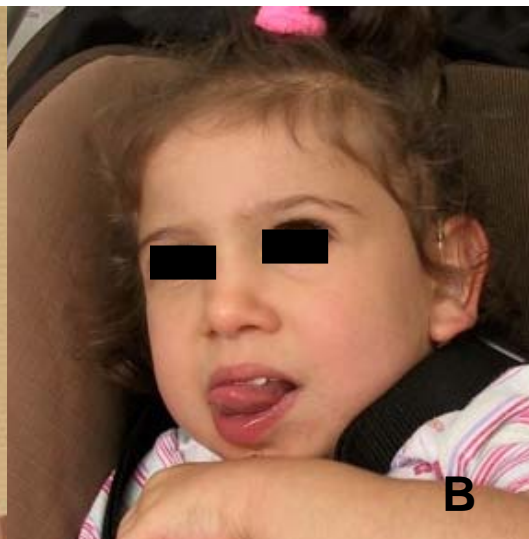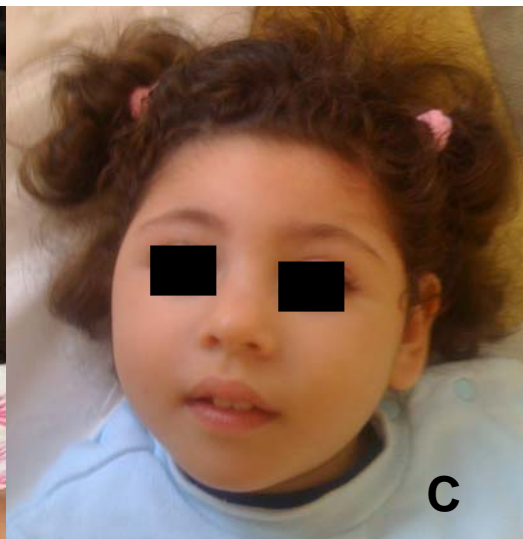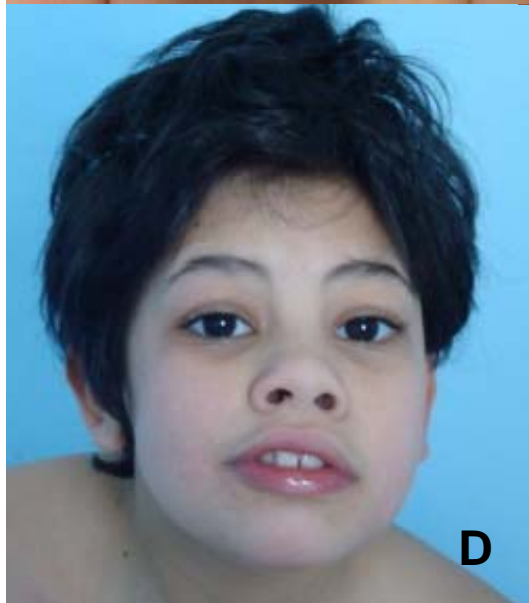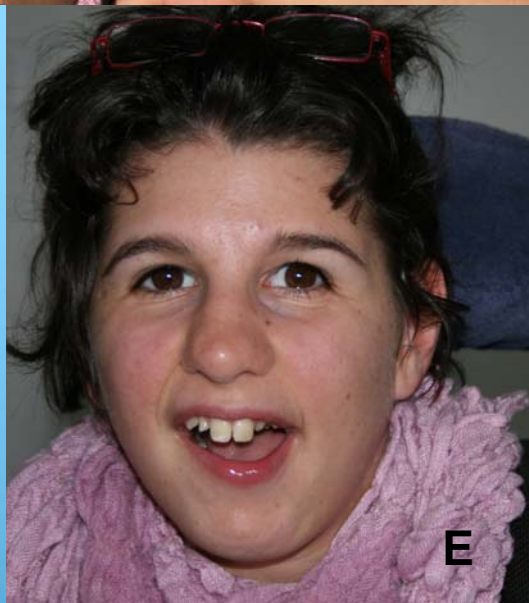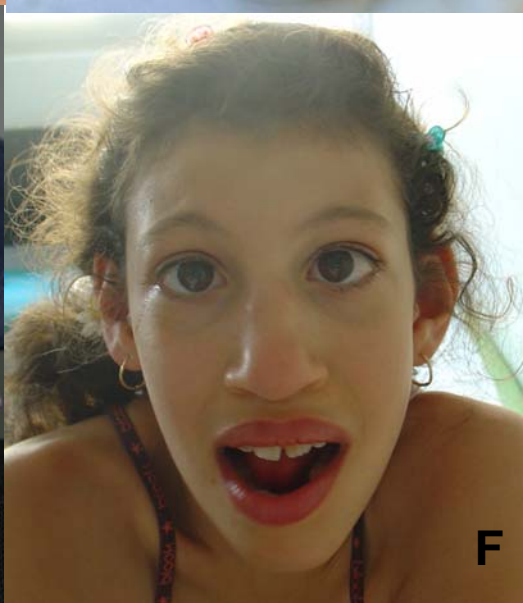

Supplement: MOESM5 [file 9642204]
